# Supplementary material
Source: PubMed Central journal article supplement (PMC11382981)

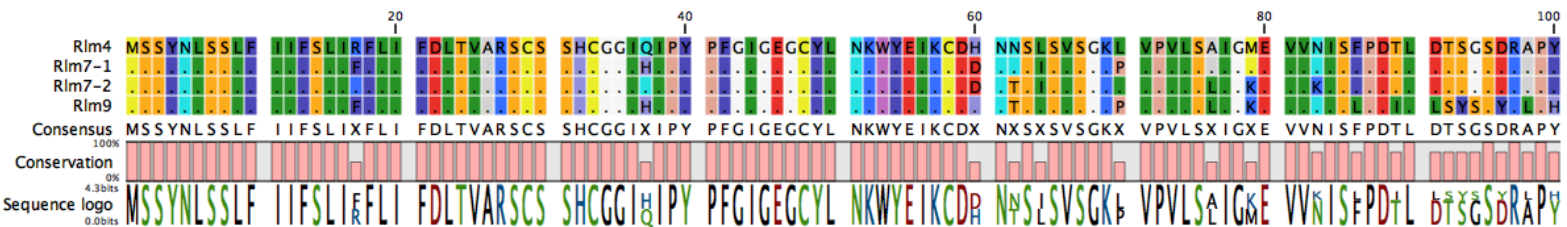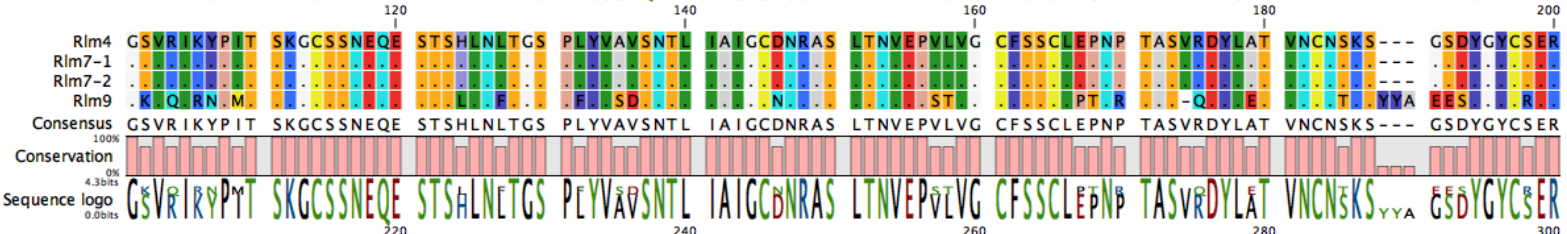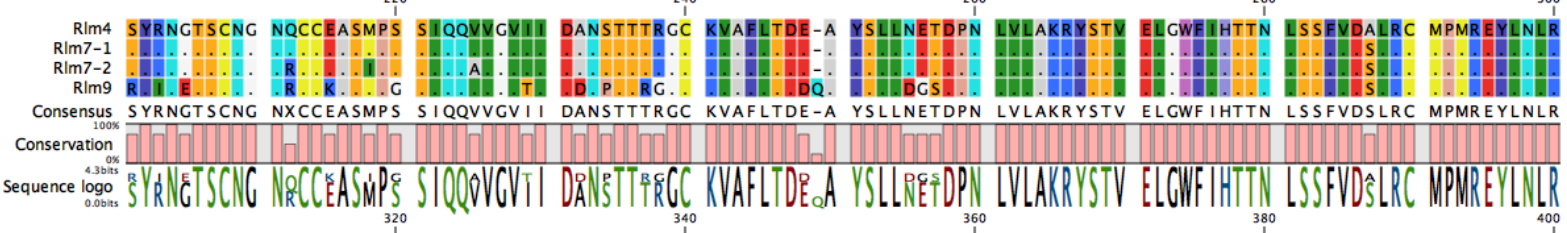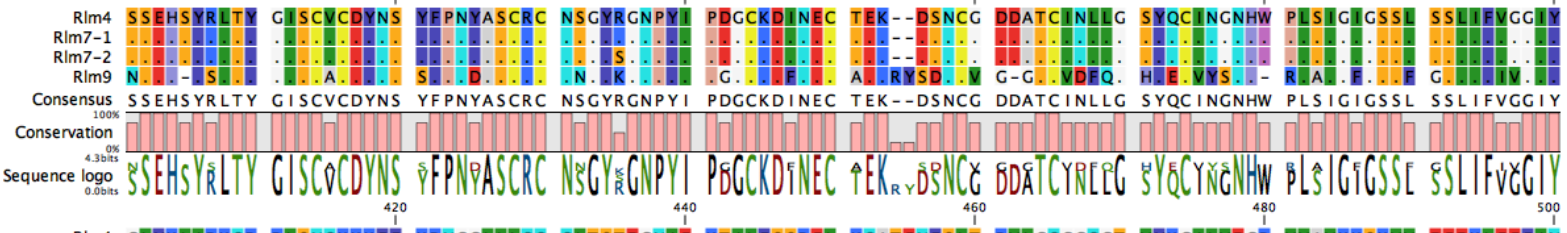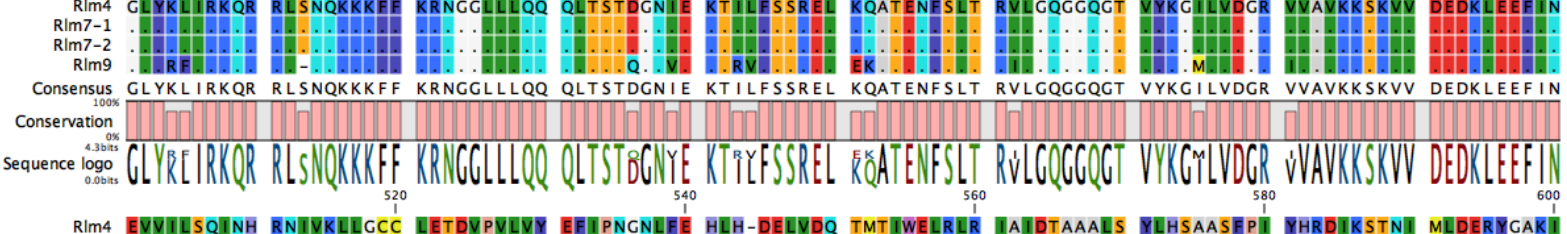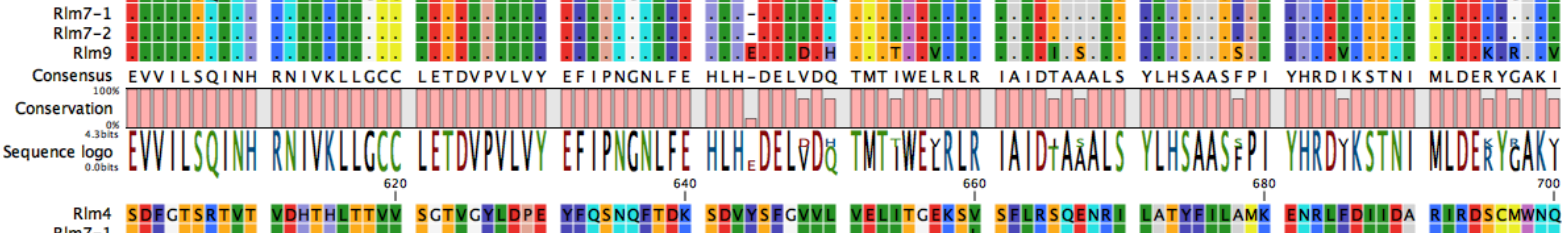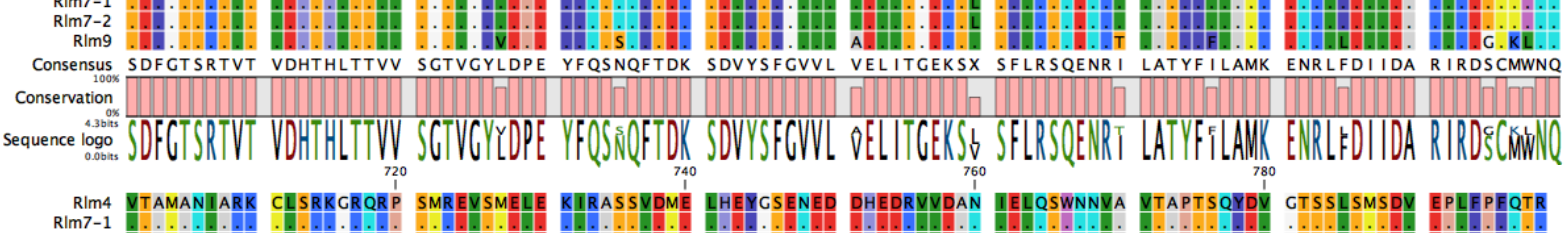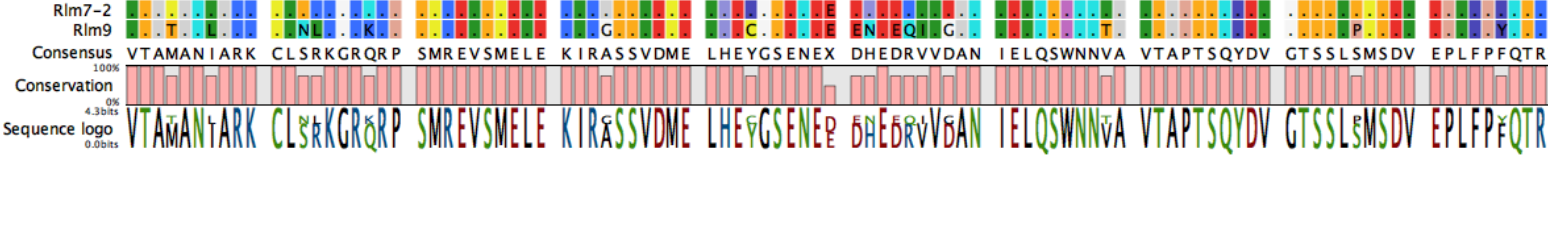

Supplement: PBI-20-1229-s001.pdf [file PBI-20-1229-s001.pdf]
